# Supplementary material
Source: PubMed Central journal article supplement (PMC4972489)
Supplement: NIHMS740810-supplement-01.pdf [file NIHMS740810-supplement-01.pdf]

## Supplemental Data

### Legend

**Supplemental Table.** Inhibitors of homologous recombination combined with radiation therapy in clinical studies. (A) c-Abl kinase inhibitors, (B) tyrosine kinase inhibitors, (C) proteasome inhibitors, (D) histone deacetylase inhibitors that have been combined with radiation therapy in clinical studies. Radiation therapy delivered with conventional fractionation, unless otherwise noted. Patients in the trials are adults, unless otherwise noted. RT, fractionated external beam radiation therapy; MTD, maximum tolerated dose; OS, overall survival; SRS, stereotactic radiosurgery; DLT, dose limiting toxicity; EIAED, hepatic enzyme inducing anti-epileptic drug; WBRT, whole brain radiation therapy; SBRT, stereotactic body radiation therapy; bRFS, biochemical relapse free survival.

### Supplemental Tables

A

| <b><u>Drug</u></b> | <b><u>Study design</u></b> | <b><u>Cancer(s)</u></b>               | <b><u>Concurrent RT (dose) + other chemotherapy</u></b> | <b><u>Outcome</u></b>                                                                                                                                                                                     | <b><u>Trial identifier, Reference</u></b> |
|--------------------|----------------------------|---------------------------------------|---------------------------------------------------------|-----------------------------------------------------------------------------------------------------------------------------------------------------------------------------------------------------------|-------------------------------------------|
| imatinib           | Phase I/II                 | high grade glioma                     | RT (55.8 Gy in 22 fractions, delivered 4 days/week)     | patients received 600 mg 3 days per week; toxicity not reported; median OS: 4 months, PFS: 4 months                                                                                                       | Scheda                                    |
| imatinib           | Phase I                    | pediatric brainstem glioma            | RT (55.8 Gy in 31 fractions)                            | 50% DLT rate (intratumoral hemorrhage) at 150 mg/m <sup>2</sup> twice daily, therefore concurrent administration was discontinued (26% of patients experienced this complication with sequential therapy) | NCT00021229, Pollack                      |
| imatinib           | case report                | rectal gastrointestinal stromal tumor | RT (37.8 Gy in 21 fractions)                            | patient received 400 mg daily starting one week prior to RT, and continuing during RT; achieved partial clinical response, followed by complete pathologic response at surgery                            | Ciresa                                    |

|           |             |                                             |                                                         |                                                                                                                                                         |            |
|-----------|-------------|---------------------------------------------|---------------------------------------------------------|---------------------------------------------------------------------------------------------------------------------------------------------------------|------------|
| imatinib  | case report | metastatic gastrointestinal stromal tumor   | RT (54 Gy in 27 fractions)                              | patient received 400 mg daily during RT; durable (>37 months) clinical complete response in regions also treated with RT                                | Boruban    |
| <b>B</b>  |             |                                             |                                                         |                                                                                                                                                         |            |
| erlotinib | Phase II    | glioblastoma multiforme                     | RT (59.4 - 60 Gy in 30 - 33 fractions) + temozolomide   | patients received 200 mg daily (on EIAED), 100 mg daily (if not on EIAED) during RT; ≥3.1% grade 4 (neutropenia) toxicity; median OS: 19.3 months       | Prados     |
| erlotinib | Phase II    | glioblastoma multiforme                     | RT (60 Gy in 30 fractions) + temozolomide               | MTD: 50-150 mg daily (escalated dose in each patient); 11% grade 5 toxicity rate; median OS: 8.3 months                                                 | Peereboom  |
| erlotinib | Phase I/II  | glioblastoma multiforme                     | RT (60 Gy in 30 fractions) + temozolomide               | patients received 150 mg daily 1 week prior to, and during RT; 2.5% grade 5 (pneumonia) and ≥7.3% grade 4 (leukopenia) toxicity; median OS: 15.7 months | Brown      |
| erlotinib | Phase I     | locally advanced pancreatic cancer          | RT (50.4 Gy in 28 fractions) + gemcitabine/paclitaxel   | MTD: 50 mg daily; 6 of 13 patients had partial response; median OS: 14 months                                                                           | Ianitti    |
| erlotinib | Phase I     | locally advanced pancreatic cancer          | RT (50.4 Gy in 28 fractions) + gemcitabine              | MTD: 100 mg daily; 6 of 17 patients had partial response; median OS: 18.7 months                                                                        | Duffy      |
| erlotinib | Phase I     | locally advanced pancreatic cancer          | RT (30 - 38 Gy in 15 - 19 fractions) + gemcitabine      | patients received 100 mg daily; MTD of RT was 30 Gy in 15 fractions; efficacy not reported                                                              | Robertson  |
| erlotinib | Phase I     | locally advanced non-small cell lung cancer | RT (50.4 Gy in 28 fractions) + cisplatin/5-fluorouracil | MTD: 150 mg daily; no response data reported                                                                                                            | Dobelbower |
| erlotinib | Phase I     | locally advanced non-small cell lung cancer | RT (45 - 60 Gy in 15 - 30 fractions)                    | MTD: 100 mg daily; 20% rate of grade 5 toxicity (pneumonitis) at 150 mg daily; 62.5% clinical partial response                                          | Wan        |
| erlotinib | Phase I     | glioblastoma multiforme                     | RT (60 Gy in 30 fractions)                              | MTD: ≥200 mg daily (on EIAED), ≥150 mg daily (if no EIAED); median OS: 11.7 months (on EIAED), 15.1 months (if no EIAED)                                | Krishnan   |
| erlotinib | Phase I     | pediatric high grade glioma                 | RT (54 - 59.4 Gy in 30 - 33 fractions)                  | MTD: 120 mg daily; median OS: ~24 months                                                                                                                | Broniscer  |

|           |             |                                                  |                                                                            |                                                                                                                                                                             |                          |
|-----------|-------------|--------------------------------------------------|----------------------------------------------------------------------------|-----------------------------------------------------------------------------------------------------------------------------------------------------------------------------|--------------------------|
| erlotinib | Phase I     | brain metastasis from non-small cell lung cancer | WBRT (30 Gy in 10 fractions)                                               | MTD: 150 mg daily; median OS: 4.4 months                                                                                                                                    | NCT00536861, Lind        |
| erlotinib | Phase I     | locally advanced non-small cell lung cancer      | RT (66 Gy in 33 fractions) + cisplatin/etoposide or carboplatin/paclitaxel | MTD: 150 mg daily; median OS: 11 months                                                                                                                                     | Choong                   |
| erlotinib | Phase I     | uterine cervix cancer                            | RT (45 Gy in 25 fractions + 24 Gy in 4 insertions) + cisplatin             | MTD: 150 mg daily; 91.7% clinical complete response rate                                                                                                                    | Nogueira-Rodrigues       |
| erlotinib | case report | metastatic non-small cell lung cancer            | RT (16 Gy in 2 fractions), once weekly                                     | patient receiving 150 mg daily experienced fatal diarrhea                                                                                                                   | Silvano                  |
| erlotinib | case report | 2nd primary non-small cell lung cancer           | RT (50 Gy in 25 fractions)                                                 | patient receiving erlotinib for initial primary non-small cell lung cancer experienced complete clinical response at 28 Gy; grade 3 pneumonitis developed 10 weeks after RT | Nanda                    |
| gefitinib | Phase II    | brain metastases from non-small cell lung cancer | WBRT (40 Gy in 20 fractions)                                               | patients received 250 mg daily during RT; no grade $\geq 4$ toxicity; median OS: 13.0 months                                                                                | Ma                       |
| gefitinib | Phase II    | locally advanced head and neck cancer            | RT (68.4 Gy in 38 fractions) +/- docetaxel                                 | MTD: 250 mg daily; 3 year OS: 54%                                                                                                                                           | Hainsworth               |
| gefitinib | Phase II    | locally advanced pancreatic cancer               | RT (50.4 Gy in 28 fractions) + paclitaxel                                  | patients received 250 mg daily 7-10 days before, and during RT; no grade $\geq 4$ toxicity; median OS: 8 months                                                             | Olsen                    |
| gefitinib | Phase II    | locally advanced esophageal cancer               | RT (1.5 Gy in 20 fractions) twice daily + cisplatin/5-fluorouracil         | patients received 250 mg daily during RT; 5% grade 3-4 toxicity; median OS: 24 months                                                                                       | NCT00258323, Rodriguez   |
| gefitinib | Phase II    | locally advanced non-small cell lung cancer      | RT (66 Gy in 33 fractions) + carboplatin/paclitaxel (if good risk)         | patients received 250 mg daily; toxicity not reported; median OS: 19.0 months (poor risk), 12.0 months (good risk)                                                          | NCT00040794, Ready       |
| gefitinib | Phase I/II  | localized prostate cancer                        | RT (72.4 Gy in 29 fractions)                                               | patients treated with 250 mg daily 7 days before, and during RT; 38.1% of patients experienced DLTs; 5 year bRFS: 97%                                                       | NCT00239291, Joensuu     |
| gefitinib | Phase I/II  | glioblastoma multiforme                          | RT                                                                         | MTD: 500 mg daily (if not on EIAED); median OS: 11 months                                                                                                                   | NCT00052208, Chakravarti |

|           |            |                                             |                                                     |                                                                                                                                                            |                          |
|-----------|------------|---------------------------------------------|-----------------------------------------------------|------------------------------------------------------------------------------------------------------------------------------------------------------------|--------------------------|
| gefitinib | Phase I/II | locally advanced esophageal cancer          | RT (50.4 Gy in 28 fractions) + oxaliplatin          | patients received 150 mg daily during RT; no grade $\geq 4$ toxicity; median OS: 10.8 months                                                               | NCT00093652, Javle       |
| gefitinib | Phase I/II | locally advanced head and neck cancer       | RT (50 - 104 Gy in 25 - 52 fractions)               | MTD: 250 mg daily; median OS: 8.5 months                                                                                                                   | NCT00233636, Caponigro   |
| gefitinib | Phase I    | locally advanced head and neck cancer       | RT (70 Gy) +/- cisplatin                            | MTD: 500 mg daily; 3 year OS: 74%                                                                                                                          | NCT00033449, Chen        |
| gefitinib | Phase I    | locally advanced head and neck cancer       | RT (70 - 76 Gy in 35 - 38 fractions) + paclitaxel   | MTD: 250 mg daily (with paclitaxel 36 mg/m <sup>2</sup> weekly); 50% complete pathologic response rate                                                     | NCT00083057, Van Waes    |
| gefitinib | Phase I    | locally advanced non-small cell lung cancer | RT (74 Gy in 37 fractions) + carboplatin/paclitaxel | patients received 250 mg daily during RT; 4.8% grade 4 toxicity (embolism and thrombocytopenia); median OS: 16 months                                      | NCT00280787, Stinchcombe |
| gefitinib | Phase I    | locally advanced non-small cell lung cancer | RT (70 Gy in 35 fractions) + docetaxel              | patients received 250 mg daily; MTD of docetaxel: 20 mg/m <sup>2</sup> ; median OS: 21 months                                                              | NCT00310154, Center      |
| gefitinib | Phase I    | rectal and pancreatic cancer                | RT (50.4 Gy in 28 fractions) + capecitabine         | MTD: <250 mg daily (50% of patients experienced DLTs at initial dose level); all patients that underwent resection experienced partial pathologic response | Czito                    |
| gefitinib | Phase I    | locally advanced pancreatic cancer          | RT (45 Gy in 25 fractions) + gemcitabine            | MTD: 250 mg daily (with gemcitabine 200 mg/m <sup>2</sup> ); median OS: 7.5 months                                                                         | Maurel                   |
| gefitinib | Phase I    | recurrent malignant glioma                  | SRS (18 - 36 Gy in 3 fractions)                     | patients received 250 mg daily, 7 days before, and during SRS; no toxicity reported; median OS: 10 months                                                  | Schwer                   |

## C

|            |         |                                              |                                                     |                                                                                                                      |                       |
|------------|---------|----------------------------------------------|-----------------------------------------------------|----------------------------------------------------------------------------------------------------------------------|-----------------------|
| bortezomib | Phase I | recurrent or metastatic head and neck cancer | RT (50 - 70 Gy in 25 - 35 fractions)                | MTD: <0.6 mg/m <sup>2</sup> (40% of patients experienced DLTs at initial dose level); median OS: 6 months            | NCT00016003, Van Waes |
| bortezomib | Phase I | primary and recurrent central nervous system | RT (30 - 66 Gy in 10 - 35 fractions) + temozolomide | MTD: 1.3 mg/m <sup>2</sup> ; median OS: 17.4 months (all diseases), 16.9 months (newly diagnosed high grade gliomas) | Kubicek               |

cancers

|            |             |                                             |                                                             |                                                                                                                  |                       |
|------------|-------------|---------------------------------------------|-------------------------------------------------------------|------------------------------------------------------------------------------------------------------------------|-----------------------|
| bortezomib | Phase I     | relapsed/refractory multiple myeloma        | <sup>153</sup> Sm-lexidronam pentasodium (0.5 - 1.0 mCi/kg) | MTD: 1.3 mg/m <sup>2</sup> (for 0.5 mCi/kg), ≥1.0 mg/m <sup>2</sup> (for 1.0 mCi/kg); overall response rate: 21% | NCT00316940, Berenson |
| nelfinavir | Phase I     | locally advanced pancreatic cancer          | RT (59.4 Gy in 33 fractions) + cisplatin/gemcitabine        | patient received 1.25 mg twice daily; 10% rate of DLTs (gastrointestinal); median OS: ≥9.5 months                | Brunner               |
| nelfinavir | case report | locally advanced non-small cell lung cancer | RT (20 Gy in 10 fractions)                                  | patient taking 3.75 mg twice daily experienced rapid clinical complete response, then died of hemoptysis         | Chapman               |

D

|               |                      |                             |                             |                                                                                                 |                      |
|---------------|----------------------|-----------------------------|-----------------------------|-------------------------------------------------------------------------------------------------|----------------------|
| valproic acid | Phase I/II           | high grade glioma           | RT + temozolomide           | preliminary MTD: 25 mg/kg twice daily; efficacy not reported                                    | NCT00313664, Kamrava |
| vorinostat    | Phase I              | pelvic malignancies         | RT                          | preliminary MTD: ≥300 mg once daily                                                             | NCT00455351, Ree     |
| valproic acid | retrospective cohort | pediatric high grade glioma | RT +/- various chemotherapy | no grade ≥4 toxicity; median OS: 17.9 months (includes patients not treated with valproic acid) | Masoudi              |
| valproic acid | retrospective cohort | high grade glioma           | RT +/- various chemotherapy | no grade ≥3 toxicity; median OS: 16.5 months                                                    | Barker               |
| valproic acid | retrospective cohort | high grade glioma           | RT +/- various chemotherapy | toxicity not reported; median OS: 14.7 months                                                   | Sulman               |
